# Supplementary material
Source: PubMed Central journal article supplement (PMC8525237)

# Supplementary Table 1.

A

## Differential H3K4me2 binding sites MSigDB Perturbation

| Rank | Term Name                                                                                                                                                                               | Binom Raw P-Value |
|------|-----------------------------------------------------------------------------------------------------------------------------------------------------------------------------------------|-------------------|
| 1    | Genes with promoters occupied by PML-RAR $\alpha$ fusion [GeneID=5371,5914] protein in acute promyelocytic leukemia(APL) cells NB4 and two APL primary blasts, based on ChIP-seq data.  | 2.10E-46          |
| 2    | The 'MLL signature 1': genes up-regulated in pediatric AML (acute myeloid leukemia) with rearranged MLL [GeneID=4297] compared to all AML cases with the intact gene.                   | 7.37E-24          |
| 3    | The 'MLL signature 2': genes up-regulated in pediatric AML (acute myeloid leukemia) with rearranged MLL [GeneID=4297] compared to the AML cases with intact MLL and NPM1 [GeneID=4869]. | 4.03E-23          |
| 4    | Up-regulated genes in colon carcinoma tumors compared to the matched normal mucosa samples.                                                                                             | 1.02E-16          |
| 5    | Genes up-regulated in NHEK cells (normal epidermal keratinocytes) after UVB irradiation.                                                                                                | 4.00E-16          |

B

## Known tranCrtliption factor motifs for differential H3K4me2 binding sites

| Rank | Motif                                                                               | Name           | P-value  | # Target Sequences with Motif | % of Targets Sequences with Motif |
|------|-------------------------------------------------------------------------------------|----------------|----------|-------------------------------|-----------------------------------|
| 1    |    | ETS1           | 1.00E-48 | 949                           | 20.62%                            |
| 2    |   | PU.1           | 1.00E-35 | 1452                          | 31.55%                            |
| 3    |  | EWS:ERG-fusion | 1.00E-27 | 1612                          | 35.03%                            |
| 4    |  | SpiB           | 1.00E-25 | 724                           | 15.73%                            |
| 5    |  | C/EBP          | 1.00E-23 | 1036                          | 22.51%                            |

C

## KDM5A binding sites MSigDB Pathways

| Rank | Term Name                                                          | P-Value  |
|------|--------------------------------------------------------------------|----------|
| 1    | Genes involved in Gene Expression                                  | 2.88E-28 |
| 2    | Genes involved in HIV Infection                                    | 2.12E-21 |
| 3    | Genes involved in Processing of Capped Intron-Containing Pre-mRNA  | 1.83E-18 |
| 4    | Spliceosome                                                        | 7.05E-18 |
| 5    | Genes involved in Formation and Maturation of mRNA TranCrtlipt     | 1.55E-16 |
| 6    | Genes involved in Host Interactions of HIV factors                 | 2.54E-16 |
| 7    | Genes involved in Mitotic M-M/G1 phases                            | 9.85E-16 |
| 8    | Genes involved in Cell Cycle, Mitotic                              | 2.21E-15 |
| 9    | Genes involved in Elongation and Processing of Capped TranCrtlipts | 1.48E-14 |
| 10   | Genes involved in Cell Cycle Checkpoints                           | 9.13E-14 |

## Supplementary Table 2

### PML-RAR $\alpha$ Target Genes

[https://www.gsea-msigdb.org/gsea/msigdb/geneset\\_page.jsp?geneSetName=MARTENS\\_BOUND\\_BY\\_PML\\_RARA\\_FUSION&keywords=MARTENS\\_BOUND\\_BY\\_PML\\_RARA\\_FUSION](https://www.gsea-msigdb.org/gsea/msigdb/geneset_page.jsp?geneSetName=MARTENS_BOUND_BY_PML_RARA_FUSION&keywords=MARTENS_BOUND_BY_PML_RARA_FUSION)

| <b>Original Member</b> | <b>NCBI (Entrez) Gene Id</b> | <b>Gene Symbol</b>       | <b>Gene Description</b>                          |
|------------------------|------------------------------|--------------------------|--------------------------------------------------|
| ABHD2                  | <a href="#">11057</a>        | <a href="#">ABHD2</a>    | abhydrolase domain containing 2 [...             |
| ABI3                   | <a href="#">51225</a>        | <a href="#">ABI3</a>     | ABI family member 3 [Source:HGNC ...             |
| ACP5                   | <a href="#">54</a>           | <a href="#">ACP5</a>     | "acid phosphatase 5, tartrate res...             |
| ACSF3                  | <a href="#">197322</a>       | <a href="#">ACSF3</a>    | acyl-CoA synthetase family member...             |
| ACSL1                  | <a href="#">2180</a>         | <a href="#">ACSL1</a>    | acyl-CoA synthetase long chain fa...             |
| ADAM8                  | <a href="#">101</a>          | <a href="#">ADAM8</a>    | ADAM metallopeptidase domain 8 [S...             |
| ADAMTS10               | <a href="#">81794</a>        | <a href="#">ADAMTS10</a> | ADAM metallopeptidase with thromb...             |
| ADC                    | <a href="#">113451</a>       | <a href="#">AZIN2</a>    | antizyme inhibitor 2 [Source:HGNC...             |
| ADCY10                 | <a href="#">55811</a>        | <a href="#">ADCY10</a>   | adenylate cyclase 10 [Source:HGNC...             |
| ADORA3                 | <a href="#">140</a>          | <a href="#">ADORA3</a>   | adenosine A3 receptor [Source:HGN...             |
| ADRBK1                 | <a href="#">156</a>          | <a href="#">GRK2</a>     | G protein-coupled receptor kinase...             |
| AJAP1                  | <a href="#">55966</a>        | <a href="#">AJAP1</a>    | adherens junctions associated pro...             |
| AK1                    | <a href="#">203</a>          | <a href="#">AK1</a>      | adenylate kinase 1 [Source:HGNC S...             |
| AKNA                   | <a href="#">80709</a>        | <a href="#">AKNA</a>     | AT-hook transcription factor [Sou...             |
| ALDH2                  | <a href="#">217</a>          | <a href="#">ALDH2</a>    | aldehyde dehydrogenase 2 family m...             |
| ALOX5AP                | <a href="#">241</a>          | <a href="#">ALOX5AP</a>  | arachidonate 5-lipoxygenase activ...             |
| ANKDD1A                | <a href="#">348094</a>       | <a href="#">ANKDD1A</a>  | ankyrin repeat and death domain c...             |
| ANKRD11                | <a href="#">29123</a>        | <a href="#">ANKRD11</a>  | ankyrin repeat domain 11 [Source:...             |
| ANKRD33B               | <a href="#">651746</a>       | <a href="#">ANKRD33B</a> | ankyrin repeat domain 33B [Source...             |
| ANP32E                 | <a href="#">81611</a>        | <a href="#">ANP32E</a>   | acidic nuclear phosphoprotein 32 ...             |
| ANXA11                 | <a href="#">311</a>          | <a href="#">ANXA11</a>   | annexin A11 [Source:HGNC Symbol;A...             |
| APBB1IP                | <a href="#">54518</a>        | <a href="#">APBB1IP</a>  | amyloid beta precursor protein bi...             |
| APLP2                  | <a href="#">334</a>          | <a href="#">APLP2</a>    | amyloid beta precursor like prote...             |
| ARAP1                  | <a href="#">116985</a>       | <a href="#">ARAP1</a>    | "ArfGAP with RhoGAP domain, ankyr...             |
| ARHGAP30               | <a href="#">257106</a>       | <a href="#">ARHGAP30</a> | Rho GTPase activating protein 30 ...             |
| ARHGEF2                | <a href="#">9181</a>         | <a href="#">ARHGEF2</a>  | Rho/Rac guanine nucleotide exchan...             |
| ARID2                  | <a href="#">196528</a>       | <a href="#">ARID2</a>    | AT-rich interaction domain 2 [Sou...             |
| ARID3B                 | <a href="#">10620</a>        | <a href="#">ARID3B</a>   | AT-rich interaction domain 3B [So...             |
| ARRB1                  | <a href="#">408</a>          | <a href="#">ARRB1</a>    | arrestin beta 1 [Source:HGNC Symb...             |
| ASB2                   | <a href="#">51676</a>        | <a href="#">ASB2</a>     | ankyrin repeat and SOCS box conta...             |
| ATG16L2                | <a href="#">89849</a>        | <a href="#">ATG16L2</a>  | autophagy related 16 like 2 [Sour...             |
| ATP2B4                 | <a href="#">493</a>          | <a href="#">ATP2B4</a>   | ATPase plasma membrane Ca <sup>2+</sup> trans... |
| ATP6V0C                | <a href="#">527</a>          | <a href="#">ATP6V0C</a>  | ATPase H <sup>+</sup> transporting V0 subunit... |
| ATP8B4                 | <a href="#">79895</a>        | <a href="#">ATP8B4</a>   | ATPase phospholipid transporting ...             |
| AUH                    | <a href="#">549</a>          | <a href="#">AUH</a>      | AU RNA binding methylglutaconyl-C...             |

|           |                           |                            |                                       |
|-----------|---------------------------|----------------------------|---------------------------------------|
| B3GNT7    | <a href="#">93010</a>     | <a href="#">B3GNT7</a>     | "UDP-GlcNAc:betaGal beta-1,3-N-ac...  |
| B4GALT1   | <a href="#">2683</a>      | <a href="#">B4GALT1</a>    | "beta-1,4-galactosyltransferase 1...  |
| BAGE2     | <a href="#">85319</a>     | <a href="#">BAGE2</a>      | BAGE family member 2 [Source:HGNC...  |
| BANF1     | <a href="#">8815</a>      | <a href="#">BANF1</a>      | barrier to autointegration factor...  |
| BANP      | <a href="#">54971</a>     | <a href="#">BANP</a>       | BTG3 associated nuclear protein [...  |
| BCL3      | <a href="#">602</a>       | <a href="#">BCL3</a>       | BCL3 transcription coactivator [S...  |
| BHLHE40   | <a href="#">8553</a>      | <a href="#">BHLHE40</a>    | basic helix-loop-helix family mem...  |
| BLM       | <a href="#">641</a>       | <a href="#">BLM</a>        | BLM RecQ like helicase [Source:HG...  |
| BRE       | <a href="#">9577</a>      | <a href="#">BABAM2</a>     | BRISC and BRCA1 A complex member ...  |
| BRF1      | <a href="#">2972</a>      | <a href="#">BRF1</a>       | BRF1 RNA polymerase III transcrip...  |
| BZRAP1    | <a href="#">9256</a>      | <a href="#">TSPOAP1</a>    | TSPO associated protein 1 [Source...  |
| C10orf137 | <a href="#">26098</a>     | <a href="#">EDRF1</a>      | erythroid differentiation regulat...  |
| C11orf21  | <a href="#">29125</a>     | <a href="#">C11orf21</a>   | chromosome 11 open reading frame ...  |
| C12orf24  | <a href="#">29902</a>     | <a href="#">FAM216A</a>    | family with sequence similarity 2...  |
| C15orf39  | <a href="#">56905</a>     | <a href="#">C15orf39</a>   | chromosome 15 open reading frame ...  |
| C19orf36  | <a href="#">113177</a>    | <a href="#">IZUMO4</a>     | IZUMO family member 4 [Source:HGNC... |
| C1orf106  | <a href="#">55765</a>     | <a href="#">INAVA</a>      | innate immunity activator [Source...  |
| C1orf132  | <a href="#">100128537</a> | <a href="#">MIR29B2CHG</a> | MIR29B2 and MIR29C host gene [Sou...  |
| C1orf183  | <a href="#">55924</a>     | <a href="#">INKA2</a>      | inka box actin regulator 2 [Sourc...  |
| C1orf55   | <a href="#">163859</a>    | <a href="#">SDE2</a>       | SDE2 telomere maintenance homolog...  |
| C1orf85   | <a href="#">112770</a>    | <a href="#">GLMP</a>       | glycosylated lysosomal membrane p...  |
| C1orf86   | <a href="#">199990</a>    | <a href="#">FAAP20</a>     | FA core complex associated protei...  |
| C20orf197 | <a href="#">284756</a>    | <a href="#">C20orf197</a>  | chromosome 20 open reading frame ...  |
| C20orf43  | <a href="#">51507</a>     | <a href="#">RTF2</a>       | replication termination factor 2 ...  |
| C3orf19   | <a href="#">51244</a>     | <a href="#">CCDC174</a>    | coiled-coil domain containing 174...  |
| C3orf27   | <a href="#">23434</a>     | <a href="#">LINC01565</a>  | long intergenic non-protein codin...  |
| C5AR1     | <a href="#">728</a>       | <a href="#">C5AR1</a>      | complement C5a receptor 1 [Source...  |
| C5orf62   | <a href="#">85027</a>     | <a href="#">SMIM3</a>      | small integral membrane protein 3...  |
| C9orf139  | <a href="#">401563</a>    | <a href="#">C9orf139</a>   | chromosome 9 open reading frame 1...  |
| C9orf47   |                           |                            |                                       |
| CACNA1C   | <a href="#">775</a>       | <a href="#">CACNA1C</a>    | calcium voltage-gated channel sub...  |
| CAMK2G    | <a href="#">818</a>       | <a href="#">CAMK2G</a>     | calcium/calmodulin dependent prot...  |
| CAPG      | <a href="#">822</a>       | <a href="#">CAPG</a>       | "capping actin protein, gelsolin ...  |
| CCDC114   | <a href="#">93233</a>     | <a href="#">CCDC114</a>    | coiled-coil domain containing 114...  |
| CCDC88B   | <a href="#">283234</a>    | <a href="#">CCDC88B</a>    | coiled-coil domain containing 88B...  |
| CCDC94    | <a href="#">55702</a>     | <a href="#">YJU2</a>       | YJU2 splicing factor homolog [Sou...  |
| CCND3     | <a href="#">896</a>       | <a href="#">CCND3</a>      | cyclin D3 [Source:HGNC Symbol;Acc...  |
| CD164     | <a href="#">8763</a>      | <a href="#">CD164</a>      | CD164 molecule [Source:HGNC Symbo...  |
| CD58      | <a href="#">965</a>       | <a href="#">CD58</a>       | CD58 molecule [Source:HGNC Symbol...  |
| CD82      | <a href="#">3732</a>      | <a href="#">CD82</a>       | CD82 molecule [Source:HGNC Symbol...  |
| CDH23     | <a href="#">64072</a>     | <a href="#">CDH23</a>      | cadherin related 23 [Source:HGNC ...  |
| CDK5      | <a href="#">1020</a>      | <a href="#">CDK5</a>       | cyclin dependent kinase 5 [Source...  |
| CDK9      | <a href="#">1025</a>      | <a href="#">CDK9</a>       | cyclin dependent kinase 9 [Source...  |
| CDS2      | <a href="#">8760</a>      | <a href="#">CDS2</a>       | CDP-diacylglycerol synthase 2 [So...  |

|         |                        |                         |                                        |
|---------|------------------------|-------------------------|----------------------------------------|
| CETP    | <a href="#">1071</a>   | <a href="#">CETP</a>    | cholesteryl ester transfer protei...   |
| CHD7    | <a href="#">55636</a>  | <a href="#">CHD7</a>    | chromodomain helicase DNA binding...   |
| CHST15  | <a href="#">51363</a>  | <a href="#">CHST15</a>  | carbohydrate sulfotransferase 15 ...   |
| CISH    | <a href="#">1154</a>   | <a href="#">CISH</a>    | cytokine inducible SH2 containing...   |
| CORO2A  | <a href="#">7464</a>   | <a href="#">CORO2A</a>  | coronin 2A [Source:HGNC Symbol;Ac...   |
| COTL1   | <a href="#">23406</a>  | <a href="#">COTL1</a>   | coactosin like F-actin binding pr...   |
| CPNE9   | <a href="#">151835</a> | <a href="#">CPNE9</a>   | copine family member 9 [Source:HG...   |
| CRAMP1L | <a href="#">57585</a>  | <a href="#">CRAMP1</a>  | cramped chromatin regulator homol...   |
| CRTC1   | <a href="#">23373</a>  | <a href="#">CRTC1</a>   | CREB regulated transcription coac...   |
| CSK     | <a href="#">1445</a>   | <a href="#">CSK</a>     | C-terminal Src kinase [Source:HGN...   |
| CSTF1   | <a href="#">1477</a>   | <a href="#">CSTF1</a>   | cleavage stimulation factor subun...   |
| CTCF    | <a href="#">10664</a>  | <a href="#">CTCF</a>    | CCCTC-binding factor [Source:HGNC...   |
| CTSD    | <a href="#">1509</a>   | <a href="#">CTSD</a>    | cathepsin D [Source:HGNC Symbol;A...   |
| CUEDC1  | <a href="#">404093</a> | <a href="#">CUEDC1</a>  | CUE domain containing 1 [Source:H...   |
| CUGBP2  | <a href="#">10659</a>  | <a href="#">CELF2</a>   | CUGBP Elav-like family member 2 [...   |
| CUTA    | <a href="#">51596</a>  | <a href="#">CUTA</a>    | cutA divalent cation tolerance ho...   |
| CUX1    | <a href="#">1523</a>   | <a href="#">CUX1</a>    | cut like homeobox 1 [Source:HGNC ...   |
| CXCR5   | <a href="#">643</a>    | <a href="#">CXCR5</a>   | C-X-C motif chemokine receptor 5 ...   |
| CXXC5   | <a href="#">51523</a>  | <a href="#">CXXC5</a>   | CXXC finger protein 5 [Source:HGN...   |
| CYTH4   | <a href="#">27128</a>  | <a href="#">CYTH4</a>   | cytohesin 4 [Source:HGNC Symbol;A...   |
| DAPK2   | <a href="#">23604</a>  | <a href="#">DAPK2</a>   | death associated protein kinase 2...   |
| DCAF11  | <a href="#">80344</a>  | <a href="#">DCAF11</a>  | DDB1 and CUL4 associated factor 1...   |
| DCTN1   | <a href="#">1639</a>   | <a href="#">DCTN1</a>   | dynactin subunit 1 [Source:HGNC S...   |
| DCTN4   | <a href="#">51164</a>  | <a href="#">DCTN4</a>   | dynactin subunit 4 [Source:HGNC S...   |
| DDIT4   | <a href="#">54541</a>  | <a href="#">DDIT4</a>   | DNA damage inducible transcript 4...   |
| DDX5    | <a href="#">1655</a>   | <a href="#">DDX5</a>    | DEAD-box helicase 5 [Source:HGNC ...   |
| DEF6    | <a href="#">50619</a>  | <a href="#">DEF6</a>    | DEF6 guanine nucleotide exchange ...   |
| DENND3  | <a href="#">22898</a>  | <a href="#">DENND3</a>  | DENN domain containing 3 [Source:...   |
| DNAJB12 | <a href="#">54788</a>  | <a href="#">DNAJB12</a> | DnaJ heat shock protein family (H...   |
| DNM2    | <a href="#">1785</a>   | <a href="#">DNM2</a>    | dynamamin 2 [Source:HGNC Symbol;Acc... |
| DOK3    | <a href="#">79930</a>  | <a href="#">DOK3</a>    | docking protein 3 [Source:HGNC Sy...   |
| DOT1L   | <a href="#">84444</a>  | <a href="#">DOT1L</a>   | DOT1 like histone lysine methyltr...   |
| DRG2    | <a href="#">1819</a>   | <a href="#">DRG2</a>    | developmentally regulated GTP bin...   |
| DUSP28  | <a href="#">285193</a> | <a href="#">DUSP28</a>  | dual specificity phosphatase 28 [...   |
| DUSP5   | <a href="#">1847</a>   | <a href="#">DUSP5</a>   | dual specificity phosphatase 5 [S...   |
| ECE1    | <a href="#">1889</a>   | <a href="#">ECE1</a>    | endothelin converting enzyme 1 [S...   |
| EFHD2   | <a href="#">79180</a>  | <a href="#">EFHD2</a>   | EF-hand domain family member D2 [...   |
| ELAVL1  | <a href="#">1994</a>   | <a href="#">ELAVL1</a>  | ELAV like RNA binding protein 1 [...   |
| ELF4    | <a href="#">2000</a>   | <a href="#">ELF4</a>    | E74 like ETS transcription factor...   |
| ELL     | <a href="#">8178</a>   | <a href="#">ELL</a>     | elongation factor for RNA polymer...   |
| EMR2    | <a href="#">30817</a>  | <a href="#">ADGRE2</a>  | adhesion G protein-coupled recept...   |
| ENSA    | <a href="#">2029</a>   | <a href="#">ENSA</a>    | endosulfine alpha [Source:HGNC Sy...   |
| EXOSC4  | <a href="#">54512</a>  | <a href="#">EXOSC4</a>  | exosome component 4 [Source:HGNC ...   |
| F11R    | <a href="#">50848</a>  | <a href="#">F11R</a>    | F11 receptor [Source:HGNC Symbol;...   |

|          |                        |                            |                                      |
|----------|------------------------|----------------------------|--------------------------------------|
| FAM129C  | <a href="#">199786</a> | <a href="#">NIBAN3</a>     | niban apoptosis regulator 3 [Sour... |
| FAM159A  | <a href="#">348378</a> | <a href="#">SHISAL2A</a>   | shisa like 2A [Source:HGNC Symbol... |
| FAM53B   | <a href="#">9679</a>   | <a href="#">FAM53B</a>     | family with sequence similarity 5... |
| FAM78A   | <a href="#">286336</a> | <a href="#">FAM78A</a>     | family with sequence similarity 7... |
| FAM89B   | <a href="#">23625</a>  | <a href="#">FAM89B</a>     | family with sequence similarity 8... |
| FAM96A   | <a href="#">84191</a>  | <a href="#">CIAO2A</a>     | cytosolic iron-sulfur assembly co... |
| FBXO46   | <a href="#">23403</a>  | <a href="#">FBXO46</a>     | F-box protein 46 [Source:HGNC Sym... |
| FCGRT    | <a href="#">2217</a>   | <a href="#">FCGRT</a>      | Fc fragment of IgG receptor and t... |
| FCN1     | <a href="#">2219</a>   | <a href="#">FCN1</a>       | ficolin 1 [Source:HGNC Symbol;Acc... |
| FERMT3   | <a href="#">83706</a>  | <a href="#">FERMT3</a>     | fermitin family member 3 [Source:... |
| FGFR1OP2 | <a href="#">26127</a>  | <a href="#">FGFR1OP2</a>   | FGFR1 oncogene partner 2 [Source:... |
| FGR      | <a href="#">2268</a>   | <a href="#">FGR</a>        | "FGR proto-oncogene, Src family t... |
| FHOD1    | <a href="#">29109</a>  | <a href="#">FHOD1</a>      | formin homology 2 domain containi... |
| FLNB     | <a href="#">2317</a>   | <a href="#">FLNB</a>       | filamin B [Source:HGNC Symbol;Acc... |
| FLT3     | <a href="#">2322</a>   | <a href="#">FLT3</a>       | fms related tyrosine kinase 3 [So... |
| FMNL1    | <a href="#">752</a>    | <a href="#">FMNL1</a>      | formin like 1 [Source:HGNC Symbol... |
| FNBP1    | <a href="#">23048</a>  | <a href="#">FNBP1</a>      | formin binding protein 1 [Source:... |
| FOSB     | <a href="#">2354</a>   | <a href="#">FOSB</a>       | "FosB proto-oncogene, AP-1 transc... |
| FOSL2    | <a href="#">2355</a>   | <a href="#">FOSL2</a>      | "FOS like 2, AP-1 transcription f... |
| FRAT1    | <a href="#">10023</a>  | <a href="#">FRAT1</a>      | FRAT regulator of WNT signaling p... |
| FXYD6    | <a href="#">53826</a>  | <a href="#">FXYD6</a>      | FXYD domain containing ion transp... |
| GALC     | <a href="#">2581</a>   | <a href="#">GALC</a>       | galactosylceramidase [Source:HGNC... |
| GALK2    | <a href="#">2585</a>   | <a href="#">GALK2</a>      | galactokinase 2 [Source:HGNC Symb... |
| GALNT6   | <a href="#">11226</a>  | <a href="#">GALNT6</a>     | polypeptide N-acetylgalactosaminy... |
| GAS7     | <a href="#">8522</a>   | <a href="#">AC005747.1</a> | growth arrest specific 7 [Source:... |
| GBA      | <a href="#">2629</a>   | <a href="#">GBA</a>        | glucosylceramidase beta [Source:H... |
| GBE1     | <a href="#">2632</a>   | <a href="#">GBE1</a>       | "1,4-alpha-glucan branching enzym... |
| GFOD1    | <a href="#">54438</a>  | <a href="#">GFOD1</a>      | glucose-fructose oxidoreductase d... |
| GGA1     | <a href="#">26088</a>  | <a href="#">GGA1</a>       | "golgi associated, gamma adaptin ... |
| GNB2     | <a href="#">2783</a>   | <a href="#">GNB2</a>       | G protein subunit beta 2 [Source:... |
| GNB5     | <a href="#">10681</a>  | <a href="#">GNB5</a>       | G protein subunit beta 5 [Source:... |
| GPATCH8  | <a href="#">23131</a>  | <a href="#">GPATCH8</a>    | G-patch domain containing 8 [Sour... |
| GPR114   | <a href="#">221188</a> | <a href="#">ADGRG5</a>     | adhesion G protein-coupled recept... |
| GPR132   | <a href="#">29933</a>  | <a href="#">GPR132</a>     | G protein-coupled receptor 132 [S... |
| GPR97    | <a href="#">222487</a> | <a href="#">ADGRG3</a>     | adhesion G protein-coupled recept... |
| GRIP2    | <a href="#">80852</a>  | <a href="#">GRIP2</a>      | glutamate receptor interacting pr... |
| GRK5     | <a href="#">2869</a>   | <a href="#">GRK5</a>       | G protein-coupled receptor kinase... |
| GRK6     | <a href="#">2870</a>   | <a href="#">GRK6</a>       | G protein-coupled receptor kinase... |
| GTF3A    | <a href="#">2971</a>   | <a href="#">GTF3A</a>      | general transcription factor IIIA... |
| GUSB     | <a href="#">2990</a>   | <a href="#">GUSB</a>       | glucuronidase beta [Source:HGNC S... |
| H6PD     | <a href="#">9563</a>   | <a href="#">H6PD</a>       | hexose-6-phosphate dehydrogenase/... |
| HCK      | <a href="#">3055</a>   | <a href="#">HCK</a>        | "HCK proto-oncogene, Src family t... |
| HDAC4    | <a href="#">9759</a>   | <a href="#">HDAC4</a>      | histone deacetylase 4 [Source:HGN... |
| HECW1    | <a href="#">23072</a>  | <a href="#">HECW1</a>      | "HECT, C2 and WW domain containin... |

|          |                        |                            |                                       |
|----------|------------------------|----------------------------|---------------------------------------|
| HIP1     | <a href="#">3092</a>   | <a href="#">HIP1</a>       | huntingtin interacting protein 1 ...  |
| HIVEP2   | <a href="#">3097</a>   | <a href="#">HIVEP2</a>     | HIVEP zinc finger 2 [Source:HGNC ...  |
| HIVEP3   | <a href="#">59269</a>  | <a href="#">HIVEP3</a>     | HIVEP zinc finger 3 [Source:HGNC ...  |
| HMGA1    | <a href="#">3159</a>   | <a href="#">HMGA1</a>      | high mobility group AT-hook 1 [So...  |
| HMHA1    | <a href="#">23526</a>  | <a href="#">AC004151.1</a> | Rho GTPase activating protein 45 ...  |
| HMOX1    | <a href="#">3162</a>   | <a href="#">HMOX1</a>      | heme oxygenase 1 [Source:HGNC Sym...  |
| HNRNPM   | <a href="#">4670</a>   | <a href="#">HNRNPM</a>     | heterogeneous nuclear ribonucleop...  |
| HPCAL1   | <a href="#">3241</a>   | <a href="#">HPCAL1</a>     | hippocalcin like 1 [Source:HGNC S...  |
| ICAM1    | <a href="#">3383</a>   | <a href="#">ICAM1</a>      | intercellular adhesion molecule 1...  |
| ICAM4    | <a href="#">3386</a>   | <a href="#">ICAM4</a>      | intercellular adhesion molecule 4...  |
| ID1      | <a href="#">3397</a>   | <a href="#">ID1</a>        | "inhibitor of DNA binding 1, HLH ...  |
| ID2      | <a href="#">3398</a>   | <a href="#">ID2</a>        | inhibitor of DNA binding 2 [Sourc...  |
| IDH1     | <a href="#">3417</a>   | <a href="#">IDH1</a>       | isocitrate dehydrogenase (NADP(+))... |
| IFITM3   | <a href="#">10410</a>  | <a href="#">IFITM3</a>     | interferon induced transmembrane ...  |
| IFNAR2   | <a href="#">3455</a>   | <a href="#">IFNAR2</a>     | interferon alpha and beta recepto...  |
| INHBA    | <a href="#">3624</a>   | <a href="#">INHBA</a>      | inhibin subunit beta A [Source:HG...  |
| IQCD     | <a href="#">115811</a> | <a href="#">IQCD</a>       | IQ motif containing D [Source:HGN...  |
| IQSEC1   | <a href="#">9922</a>   | <a href="#">IQSEC1</a>     | IQ motif and Sec7 domain ArfGEF 1...  |
| IRF1     | <a href="#">3659</a>   | <a href="#">IRF1</a>       | interferon regulatory factor 1 [S...  |
| IRF2BP2  | <a href="#">359948</a> | <a href="#">IRF2BP2</a>    | interferon regulatory factor 2 bi...  |
| IRF8     | <a href="#">3394</a>   | <a href="#">IRF8</a>       | interferon regulatory factor 8 [S...  |
| ITGA4    | <a href="#">3676</a>   | <a href="#">ITGA4</a>      | integrin subunit alpha 4 [Source:...  |
| ITGB2    | <a href="#">3689</a>   | <a href="#">ITGB2</a>      | integrin subunit beta 2 [Source:H...  |
| ITPR1    | <a href="#">3708</a>   | <a href="#">ITPR1</a>      | "inositol 1,4,5-trisphosphate rec...  |
| ITPR2    | <a href="#">3709</a>   | <a href="#">ITPR2</a>      | "inositol 1,4,5-trisphosphate rec...  |
| JUND     | <a href="#">3727</a>   | <a href="#">JUND</a>       | "JunD proto-oncogene, AP-1 transc...  |
| KCNAB2   | <a href="#">8514</a>   | <a href="#">KCNAB2</a>     | potassium voltage-gated channel s...  |
| KIAA0020 | <a href="#">9933</a>   | <a href="#">PUM3</a>       | pumilio RNA binding family member...  |
| KIAA0182 | <a href="#">23199</a>  | <a href="#">GSE1</a>       | Gse1 coiled-coil protein [Source:...  |
| KIAA1539 | <a href="#">80256</a>  | <a href="#">FAM214B</a>    | family with sequence similarity 2...  |
| KLF13    | <a href="#">51621</a>  | <a href="#">KLF13</a>      | Kruppel like factor 13 [Source:HG...  |
| KLF2     | <a href="#">10365</a>  | <a href="#">KLF2</a>       | Kruppel like factor 2 [Source:HGN...  |
| KLHDC4   | <a href="#">54758</a>  | <a href="#">KLHDC4</a>     | kelch domain containing 4 [Source...  |
| KLHL24   | <a href="#">54800</a>  | <a href="#">KLHL24</a>     | kelch like family member 24 [Sour...  |
| KPTN     | <a href="#">11133</a>  | <a href="#">KPTN</a>       | "kaptin, actin binding protein [S...  |
| KREMEN1  | <a href="#">83999</a>  | <a href="#">KREMEN1</a>    | kringle containing transmembrane ...  |
| KRI1     | <a href="#">65095</a>  | <a href="#">KRI1</a>       | KRI1 homolog [Source:HGNC Symbol;...  |
| KSR1     | <a href="#">8844</a>   | <a href="#">KSR1</a>       | kinase suppressor of ras 1 [Sourc...  |
| LAPTM5   | <a href="#">7805</a>   | <a href="#">LAPTM5</a>     | lysosomal protein transmembrane 5...  |
| LASP1    | <a href="#">3927</a>   | <a href="#">LASP1</a>      | LIM and SH3 protein 1 [Source:HGN...  |
| LATS2    | <a href="#">26524</a>  | <a href="#">LATS2</a>      | large tumor suppressor kinase 2 [...  |
| LBR      | <a href="#">3930</a>   | <a href="#">LBR</a>        | lamin B receptor [Source:HGNC Sym...  |
| LCP2     | <a href="#">3937</a>   | <a href="#">LCP2</a>       | lymphocyte cytosolic protein 2 [S...  |
| LETMD1   | <a href="#">25875</a>  | <a href="#">LETMD1</a>     | LETM1 domain containing 1 [Source...  |



|         |                        |                         |                                       |
|---------|------------------------|-------------------------|---------------------------------------|
| LFNG    | <a href="#">3955</a>   | <a href="#">LFNG</a>    | LFNG O-fucosylpeptide 3-beta-N-ac...  |
| LMBR1   | <a href="#">64327</a>  | <a href="#">LMBR1</a>   | limb development membrane protein...  |
| LMO2    | <a href="#">4005</a>   | <a href="#">LMO2</a>    | LIM domain only 2 [Source:HGNC Sy...  |
| LRRC20  | <a href="#">55222</a>  | <a href="#">LRRC20</a>  | leucine rich repeat containing 20...  |
| LRRC29  | <a href="#">26231</a>  | <a href="#">LRRC29</a>  | leucine rich repeat containing 29...  |
| LTB4R   | <a href="#">1241</a>   | <a href="#">LTB4R</a>   | leukotriene B4 receptor [Source:H...  |
| LTBP3   | <a href="#">4054</a>   | <a href="#">LTBP3</a>   | latent transforming growth factor...  |
| LYL1    | <a href="#">4066</a>   | <a href="#">LYL1</a>    | LYL1 basic helix-loop-helix famil...  |
| LYN     | <a href="#">4067</a>   | <a href="#">LYN</a>     | "LYN proto-oncogene, Src family t...  |
| MAFB    | <a href="#">9935</a>   | <a href="#">MAFB</a>    | MAF bZIP transcription factor B [...  |
| MAML2   | <a href="#">84441</a>  | <a href="#">MAML2</a>   | mastermind like transcriptional c...  |
| MAP2K3  | <a href="#">5606</a>   | <a href="#">MAP2K3</a>  | mitogen-activated protein kinase ...  |
| MBD6    | <a href="#">114785</a> | <a href="#">MBD6</a>    | methyl-CpG binding domain protein...  |
| MBP     | <a href="#">4155</a>   | <a href="#">MBP</a>     | myelin basic protein [Source:HGNC...  |
| MCAM    | <a href="#">4162</a>   | <a href="#">MCAM</a>    | melanoma cell adhesion molecule [...  |
| MCM5    | <a href="#">4174</a>   | <a href="#">MCM5</a>    | minichromosome maintenance comple...  |
| MDM1    | <a href="#">56890</a>  | <a href="#">MDM1</a>    | Mdm1 nuclear protein [Source:HGNC...  |
| MEF2D   | <a href="#">4209</a>   | <a href="#">MEF2D</a>   | myocyte enhancer factor 2D [Sourc...  |
| MFN1    | <a href="#">55669</a>  | <a href="#">MFN1</a>    | mitofusin 1 [Source:HGNC Symbol;A...  |
| MFSD8   | <a href="#">256471</a> | <a href="#">MFSD8</a>   | major facilitator superfamily dom...  |
| MGLL    | <a href="#">11343</a>  | <a href="#">MGLL</a>    | monoglyceride lipase [Source:HGNC...  |
| MIDN    | <a href="#">90007</a>  | <a href="#">MIDN</a>    | midnolin [Source:HGNC Symbol;Acc...   |
| MIR223  | <a href="#">407008</a> | <a href="#">MIR223</a>  | microRNA 223 [Source:HGNC Symbol;...  |
| MIR23A  | <a href="#">407010</a> | <a href="#">MIR23A</a>  | microRNA 23a [Source:HGNC Symbol;...  |
| MIR24-2 | <a href="#">407013</a> | <a href="#">MIR24-2</a> | microRNA 24-2 [Source:HGNC Symbol...  |
| MIR29B1 | <a href="#">407024</a> | <a href="#">MIR29B1</a> | microRNA 29b-1 [Source:HGNC Symbo...  |
| MIR663  | <a href="#">724033</a> | <a href="#">MIR663A</a> | microRNA 663a [Source:HGNC Symbol...  |
| MLXIPL  | <a href="#">51085</a>  | <a href="#">MLXIPL</a>  | MLX interacting protein like [Sou...  |
| MMP9    | <a href="#">4318</a>   | <a href="#">MMP9</a>    | matrix metalloproteinase 9 [Source... |
| MN1     | <a href="#">4330</a>   | <a href="#">MN1</a>     | "MN1 proto-oncogene, transcriptio...  |
| MORN3   | <a href="#">283385</a> | <a href="#">MORN3</a>   | MORN repeat containing 3 [Source:...  |
| MPG     | <a href="#">4350</a>   | <a href="#">MPG</a>     | N-methylpurine DNA glycosylase [S...  |
| MRPL1   | <a href="#">65008</a>  | <a href="#">MRPL1</a>   | mitochondrial ribosomal protein L...  |
| MRPL24  | <a href="#">79590</a>  | <a href="#">MRPL24</a>  | mitochondrial ribosomal protein L...  |
| MRPL34  | <a href="#">64981</a>  | <a href="#">MRPL34</a>  | mitochondrial ribosomal protein L...  |
| MRVI1   | <a href="#">10335</a>  | <a href="#">MRVI1</a>   | murine retrovirus integration sit...  |
| MTRF1L  | <a href="#">54516</a>  | <a href="#">MTRF1L</a>  | mitochondrial translational relea...  |
| MX2     | <a href="#">4600</a>   | <a href="#">MX2</a>     | MX dynamin like GTPase 2 [Source:...  |
| MYH9    | <a href="#">4627</a>   | <a href="#">MYH9</a>    | myosin heavy chain 9 [Source:HGNC...  |
| MYO1F   | <a href="#">4542</a>   | <a href="#">MYO1F</a>   | myosin IF [Source:HGNC Symbol;Acc...  |
| MYO9B   | <a href="#">4650</a>   | <a href="#">MYO9B</a>   | myosin IXB [Source:HGNC Symbol;Ac...  |
| NADK    | <a href="#">65220</a>  | <a href="#">NADK</a>    | NAD kinase [Source:HGNC Symbol;Ac...  |
| NBR1    | <a href="#">4077</a>   | <a href="#">NBR1</a>    | NBR1 autophagy cargo receptor [So...  |
| NCOR2   | <a href="#">9612</a>   | <a href="#">NCOR2</a>   | nuclear receptor corepressor 2 [S...  |

|            |                           |                           |                                       |
|------------|---------------------------|---------------------------|---------------------------------------|
| NCRNA00173 | <a href="#">100287569</a> | <a href="#">LINC00173</a> | long intergenic non-protein codin...  |
| NDRG1      | <a href="#">10397</a>     | <a href="#">NDRG1</a>     | N-myc downstream regulated 1 [Sou...  |
| NDUFA4     | <a href="#">4697</a>      | <a href="#">NDUFA4</a>    | NDUFA4 mitochondrial complex asso...  |
| NEK6       | <a href="#">10783</a>     | <a href="#">NEK6</a>      | NIMA related kinase 6 [Source:HGNC... |
| NFE2       | <a href="#">4778</a>      | <a href="#">NFE2</a>      | "nuclear factor, erythroid 2 [Sou...  |
| NINJ1      | <a href="#">4814</a>      | <a href="#">NINJ1</a>     | ninjurin 1 [Source:HGNC Symbol;Ac...  |
| NLRP3      | <a href="#">114548</a>    | <a href="#">NLRP3</a>     | NLR family pyrin domain containin...  |
| NME1-NME2  | <a href="#">654364</a>    | <a href="#">NME1-NME2</a> | NME1-NME2 readthrough [Source:HGN...  |
| NMUR1      | <a href="#">10316</a>     | <a href="#">NMUR1</a>     | neuromedin U receptor 1 [Source:H...  |
| NOLC1      | <a href="#">9221</a>      | <a href="#">NOLC1</a>     | nucleolar and coiled-body phospho...  |
| NOSIP      | <a href="#">51070</a>     | <a href="#">NOSIP</a>     | nitric oxide synthase interacting...  |
| NPAS4      | <a href="#">266743</a>    | <a href="#">NPAS4</a>     | neuronal PAS domain protein 4 [So...  |
| NRXN2      | <a href="#">9379</a>      | <a href="#">NRXN2</a>     | neurexin 2 [Source:HGNC Symbol;Ac...  |
| NUAK2      | <a href="#">81788</a>     | <a href="#">NUAK2</a>     | NUAK family kinase 2 [Source:HGNC...  |
| NUDT15     | <a href="#">55270</a>     | <a href="#">NUDT15</a>    | nudix hydrolase 15 [Source:HGNC S...  |
| NUDT3      | <a href="#">11165</a>     | <a href="#">NUDT3</a>     | nudix hydrolase 3 [Source:HGNC Sy...  |
| NUDT9      | <a href="#">53343</a>     | <a href="#">NUDT9</a>     | nudix hydrolase 9 [Source:HGNC Sy...  |
| NUP210     | <a href="#">23225</a>     | <a href="#">NUP210</a>    | nucleoporin 210 [Source:HGNC Symb...  |
| NUP85      | <a href="#">79902</a>     | <a href="#">NUP85</a>     | nucleoporin 85 [Source:HGNC Symbo...  |
| NUTF2      | <a href="#">10204</a>     | <a href="#">NUTF2</a>     | nuclear transport factor 2 [Sourc...  |
| OAZ1       | <a href="#">4946</a>      | <a href="#">OAZ1</a>      | ornithine decarboxylase antizyme ...  |
| OLIG1      | <a href="#">116448</a>    | <a href="#">OLIG1</a>     | oligodendrocyte transcription fac...  |
| OLIG2      | <a href="#">10215</a>     | <a href="#">OLIG2</a>     | oligodendrocyte transcription fac...  |
| P2RY2      | <a href="#">5029</a>      | <a href="#">P2RY2</a>     | purinergic receptor P2Y2 [Source:...  |
| PAFAH2     | <a href="#">5051</a>      | <a href="#">PAFAH2</a>    | platelet activating factor acetyl...  |
| PDE4DIP    | <a href="#">9659</a>      | <a href="#">PDE4DIP</a>   | phosphodiesterase 4D interacting ...  |
| PDP2       | <a href="#">57546</a>     | <a href="#">PDP2</a>      | pyruvate dehydrogenase phosphatase... |
| PEBP4      | <a href="#">157310</a>    | <a href="#">PEBP4</a>     | phosphatidylethanolamine binding ...  |
| PEX12      | <a href="#">5193</a>      | <a href="#">PEX12</a>     | peroxisomal biogenesis factor 12 ...  |
| PGC        | <a href="#">5225</a>      | <a href="#">PGC</a>       | progastricsin [Source:HGNC Symbol...  |
| PGD        | <a href="#">5226</a>      | <a href="#">PGD</a>       | phosphogluconate dehydrogenase [S...  |
| PGLS       | <a href="#">25796</a>     | <a href="#">PGLS</a>      | 6-phosphogluconolactonase [Source...  |
| PGPEP1     | <a href="#">54858</a>     | <a href="#">PGPEP1</a>    | pyroglutamyl-peptidase I [Source:...  |
| PHF12      | <a href="#">57649</a>     | <a href="#">PHF12</a>     | PHD finger protein 12 [Source:HGN...  |
| PIGL       | <a href="#">9487</a>      | <a href="#">PIGL</a>      | phosphatidylinositol glycan ancho...  |
| PIK3AP1    | <a href="#">118788</a>    | <a href="#">PIK3AP1</a>   | phosphoinositide-3-kinase adaptor...  |
| PITPNM2    | <a href="#">57605</a>     | <a href="#">PITPNM2</a>   | phosphatidylinositol transfer pro...  |
| PIWIL4     | <a href="#">143689</a>    | <a href="#">PIWIL4</a>    | piwi like RNA-mediated gene silen...  |
| PKIG       | <a href="#">11142</a>     | <a href="#">PKIG</a>      | cAMP-dependent protein kinase inh...  |
| PKM2       | <a href="#">5315</a>      | <a href="#">PKM2</a>      | pyruvate kinase M1/2 [Source:HGNC...  |
| PLAC8      | <a href="#">51316</a>     | <a href="#">PLAC8</a>     | placenta associated 8 [Source:HGN...  |
| PLCB2      | <a href="#">5330</a>      | <a href="#">PLCB2</a>     | phospholipase C beta 2 [Source:HG...  |
| PLCG2      | <a href="#">5336</a>      | <a href="#">PLCG2</a>     | phospholipase C gamma 2 [Source:H...  |
| PLEK       | <a href="#">5341</a>      | <a href="#">PLEK</a>      | pleckstrin [Source:HGNC Symbol;Ac...  |



|           |                        |                            |                                       |
|-----------|------------------------|----------------------------|---------------------------------------|
| PLEKHA2   | <a href="#">59339</a>  | <a href="#">PLEKHA2</a>    | pleckstrin homology domain contai...  |
| PLEKHO1   | <a href="#">51177</a>  | <a href="#">PLEKHO1</a>    | pleckstrin homology domain contai...  |
| PLXND1    | <a href="#">23129</a>  | <a href="#">PLXND1</a>     | plexin D1 [Source:HGNC Symbol;Acc...  |
| PMF1      | <a href="#">11243</a>  | <a href="#">PMF1</a>       | polyamine modulated factor 1 [Sou...  |
| PPCDC     | <a href="#">60490</a>  | <a href="#">PPCDC</a>      | phosphopantothenoylcysteine decar...  |
| PREX1     | <a href="#">57580</a>  | <a href="#">PREX1</a>      | "phosphatidylinositol-3,4,5-trisp...  |
| PRKCD     | <a href="#">5580</a>   | <a href="#">PRKCD</a>      | protein kinase C delta [Source:HG...  |
| PSAP      | <a href="#">5660</a>   | <a href="#">PSAP</a>       | prosaposin [Source:HGNC Symbol;Ac...  |
| PSMD3     | <a href="#">5709</a>   | <a href="#">PSMD3</a>      | "proteasome 26S subunit, non-ATPa...  |
| PSMD9     | <a href="#">5715</a>   | <a href="#">PSMD9</a>      | "proteasome 26S subunit, non-ATPa...  |
| PTEN      | <a href="#">5728</a>   | <a href="#">PTEN</a>       | phosphatase and tensin homolog [S...  |
| PTGES     | <a href="#">9536</a>   | <a href="#">PTGES</a>      | prostaglandin E synthase [Source:...  |
| PTPN6     | <a href="#">5777</a>   | <a href="#">PTPN6</a>      | protein tyrosine phosphatase non-...  |
| PTPRJ     | <a href="#">5795</a>   | <a href="#">PTPRJ</a>      | protein tyrosine phosphatase rece...  |
| PVRL1     | <a href="#">5818</a>   | <a href="#">NECTIN1</a>    | nectin cell adhesion molecule 1 [...  |
| PVRL4     | <a href="#">81607</a>  | <a href="#">NECTIN4</a>    | nectin cell adhesion molecule 4 [...  |
| PXN       | <a href="#">5829</a>   | <a href="#">PXN</a>        | paxillin [Source:HGNC Symbol;Acc:...  |
| RAB11FIP1 | <a href="#">80223</a>  | <a href="#">RAB11FIP1</a>  | RAB11 family interacting protein ...  |
| RAB11FIP3 | <a href="#">9727</a>   | <a href="#">RAB11FIP3</a>  | RAB11 family interacting protein ...  |
| RAB20     | <a href="#">55647</a>  | <a href="#">RAB20</a>      | "RAB20, member RAS oncogene famil...  |
| RAB31     | <a href="#">11031</a>  | <a href="#">RAB31</a>      | "RAB31, member RAS oncogene famil...  |
| RAB37     | <a href="#">326624</a> | <a href="#">RAB37</a>      | "RAB37, member RAS oncogene famil...  |
| RAB3D     | <a href="#">9545</a>   | <a href="#">RAB3D</a>      | "RAB3D, member RAS oncogene famil...  |
| RAB43     | <a href="#">339122</a> | <a href="#">RAB43</a>      | "RAB43, member RAS oncogene famil...  |
| RAC2      | <a href="#">5880</a>   | <a href="#">RAC2</a>       | Rac family small GTPase 2 [Source:... |
| RAP1GAP2  | <a href="#">23108</a>  | <a href="#">AC002316.1</a> | RAP1 GTPase activating protein 2 ...  |
| RAPGEF1   | <a href="#">2889</a>   | <a href="#">RAPGEF1</a>    | Rap guanine nucleotide exchange f...  |
| RARA      | <a href="#">5914</a>   | <a href="#">RARA</a>       | retinoic acid receptor alpha [Sou...  |
| RASA3     | <a href="#">22821</a>  | <a href="#">RASA3</a>      | RAS p21 protein activator 3 [Sour...  |
| RASGRP2   | <a href="#">10235</a>  | <a href="#">RASGRP2</a>    | RAS guanyl releasing protein 2 [S...  |
| RAVER1    | <a href="#">125950</a> | <a href="#">RAVER1</a>     | "ribonucleoprotein, PTB binding 1...  |
| RBBP8     | <a href="#">5932</a>   | <a href="#">RBBP8</a>      | "RB binding protein 8, endonuclea...  |
| RCSD1     | <a href="#">92241</a>  | <a href="#">RCSD1</a>      | RCSD domain containing 1 [Source:...  |
| RFX2      | <a href="#">5990</a>   | <a href="#">RFX2</a>       | regulatory factor X2 [Source:HGNC...  |
| RHBDF2    | <a href="#">79651</a>  | <a href="#">RHBDF2</a>     | rhomoid 5 homolog 2 [Source:HGNC...   |
| RNF122    | <a href="#">79845</a>  | <a href="#">RNF122</a>     | ring finger protein 122 [Source:H...  |
| RNF149    | <a href="#">284996</a> | <a href="#">RNF149</a>     | ring finger protein 149 [Source:H...  |
| RNF34     | <a href="#">80196</a>  | <a href="#">RNF34</a>      | ring finger protein 34 [Source:HG...  |
| RPL24     | <a href="#">6152</a>   | <a href="#">RPL24</a>      | ribosomal protein L24 [Source:HGN...  |
| RPL9      | <a href="#">6133</a>   | <a href="#">RPL9</a>       | ribosomal protein L9 [Source:HGNC...  |
| RPS19     | <a href="#">6223</a>   | <a href="#">RPS19</a>      | ribosomal protein S19 [Source:HGN...  |
| RPS6      | <a href="#">6194</a>   | <a href="#">RPS6</a>       | ribosomal protein S6 [Source:HGNC...  |
| RPS6KA1   | <a href="#">6195</a>   | <a href="#">RPS6KA1</a>    | ribosomal protein S6 kinase A1 [S...  |
| RPS6KA2   | <a href="#">6196</a>   | <a href="#">RPS6KA2</a>    | ribosomal protein S6 kinase A2 [S...  |

|          |                        |                          |                                      |
|----------|------------------------|--------------------------|--------------------------------------|
| RPS9     | <a href="#">6203</a>   | <a href="#">RPS9</a>     | ribosomal protein S9 [Source:HGNC... |
| RSL24D1  | <a href="#">51187</a>  | <a href="#">RSL24D1</a>  | ribosomal L24 domain containing 1... |
| RSRC2    | <a href="#">65117</a>  | <a href="#">RSRC2</a>    | arginine and serine rich coiled-c... |
| RUNX1    | <a href="#">861</a>    | <a href="#">RUNX1</a>    | RUNX family transcription factor ... |
| RUNX3    | <a href="#">864</a>    | <a href="#">RUNX3</a>    | RUNX family transcription factor ... |
| RUVBL1   | <a href="#">8607</a>   | <a href="#">RUVBL1</a>   | RuvB like AAA ATPase 1 [Source:HG... |
| RWDD1    | <a href="#">51389</a>  | <a href="#">RWDD1</a>    | RWD domain containing 1 [Source:H... |
| SCARB1   | <a href="#">949</a>    | <a href="#">SCARB1</a>   | scavenger receptor class B member... |
| SCUBE1   | <a href="#">80274</a>  | <a href="#">SCUBE1</a>   | "signal peptide, CUB domain and E... |
| SEC11A   | <a href="#">23478</a>  | <a href="#">SEC11A</a>   | "SEC11 homolog A, signal peptidas... |
| SEC11B   | <a href="#">157708</a> | <a href="#">SEC11B</a>   | "SEC11 homolog B, signal peptidas... |
| SERPINB1 | <a href="#">1992</a>   | <a href="#">SERPINB1</a> | serpin family B member 1 [Source:... |
| SETD8    | <a href="#">387893</a> | <a href="#">KMT5A</a>    | lysine methyltransferase 5A [Sour... |
| SF3A3    | <a href="#">10946</a>  | <a href="#">SF3A3</a>    | splicing factor 3a subunit 3 [Sou... |
| SH2B1    | <a href="#">25970</a>  | <a href="#">SH2B1</a>    | SH2B adaptor protein 1 [Source:HG... |
| SH3BGRL3 | <a href="#">83442</a>  | <a href="#">SH3BGRL3</a> | SH3 domain binding glutamate rich... |
| SH3BP2   | <a href="#">6452</a>   | <a href="#">SH3BP2</a>   | SH3 domain binding protein 2 [Sou... |
| SH3PXD2A | <a href="#">9644</a>   | <a href="#">SH3PXD2A</a> | SH3 and PX domains 2A [Source:HGN... |
| SIK1     | <a href="#">150094</a> | <a href="#">SIK1</a>     | salt inducible kinase 1 [Source:H... |
| SIRPA    | <a href="#">140885</a> | <a href="#">SIRPA</a>    | signal regulatory protein alpha [... |
| SKI      | <a href="#">6497</a>   | <a href="#">SKI</a>      | SKI proto-oncogene [Source:HGNC S... |
| SLC22A11 | <a href="#">55867</a>  | <a href="#">SLC22A11</a> | solute carrier family 22 member 1... |
| SLC24A3  | <a href="#">57419</a>  | <a href="#">SLC24A3</a>  | solute carrier family 24 member 3... |
| SLC25A19 | <a href="#">60386</a>  | <a href="#">SLC25A19</a> | solute carrier family 25 member 1... |
| SLC35B1  | <a href="#">10237</a>  | <a href="#">SLC35B1</a>  | solute carrier family 35 member B... |
| SLC6A6   | <a href="#">6533</a>   | <a href="#">SLC6A6</a>   | solute carrier family 6 member 6 ... |
| SLC7A10  | <a href="#">56301</a>  | <a href="#">SLC7A10</a>  | solute carrier family 7 member 10... |
| SLC7A5   | <a href="#">8140</a>   | <a href="#">SLC7A5</a>   | solute carrier family 7 member 5 ... |
| SLC7A5P1 | <a href="#">81893</a>  | <a href="#">SLC7A5P1</a> | solute carrier family 7 member 5 ... |
| SLC9A1   | <a href="#">6548</a>   | <a href="#">SLC9A1</a>   | solute carrier family 9 member A1... |
| SLC9A3   | <a href="#">6550</a>   | <a href="#">SLC9A3</a>   | solute carrier family 9 member A3... |
| SMAD3    | <a href="#">4088</a>   | <a href="#">SMAD3</a>    | SMAD family member 3 [Source:HGNC... |
| SMG6     | <a href="#">23293</a>  | <a href="#">SMG6</a>     | SMG6 nonsense mediated mRNA decay... |
| SNX20    | <a href="#">124460</a> | <a href="#">SNX20</a>    | sorting nexin 20 [Source:HGNC Sym... |
| SPG7     | <a href="#">6687</a>   | <a href="#">SPG7</a>     | "SPG7 matrix AAA peptidase subuni... |
| SPHK2    | <a href="#">56848</a>  | <a href="#">SPHK2</a>    | sphingosine kinase 2 [Source:HGNC... |
| SPI1     | <a href="#">6688</a>   | <a href="#">SPI1</a>     | Spi-1 proto-oncogene [Source:HGNC... |
| SPN      | <a href="#">6693</a>   | <a href="#">SPN</a>      | sialophorin [Source:HGNC Symbol;A... |
| SPTBN1   | <a href="#">6711</a>   | <a href="#">SPTBN1</a>   | "spectrin beta, non-erythrocytic ... |
| SQSTM1   | <a href="#">8878</a>   | <a href="#">SQSTM1</a>   | sequestosome 1 [Source:HGNC Symbo... |
| SREBF1   | <a href="#">6720</a>   | <a href="#">SREBF1</a>   | sterol regulatory element binding... |
| ST3GAL2  | <a href="#">6483</a>   | <a href="#">ST3GAL2</a>  | "ST3 beta-galactoside alpha-2,3-s... |
| STK24    | <a href="#">8428</a>   | <a href="#">STK24</a>    | serine/threonine kinase 24 [Sourc... |
| STRADA   | <a href="#">92335</a>  | <a href="#">STRADA</a>   | STE20 related adaptor alpha [Sour... |

|           |                        |                           |                                       |
|-----------|------------------------|---------------------------|---------------------------------------|
| STXBP2    | <a href="#">6813</a>   | <a href="#">STXBP2</a>    | syntaxin binding protein 2 [Sour...   |
| SULF2     | <a href="#">55959</a>  | <a href="#">SULF2</a>     | sulfatase 2 [Source:HGNC Symbol;A...  |
| SUSD3     | <a href="#">203328</a> | <a href="#">SUSD3</a>     | sushi domain containing 3 [Source...  |
| SYT2      | <a href="#">127833</a> | <a href="#">SYT2</a>      | synaptotagmin 2 [Source:HGNC Symb...  |
| TAGLN2    | <a href="#">8407</a>   | <a href="#">TAGLN2</a>    | transgelin 2 [Source:HGNC Symbol;...  |
| TARBP1    | <a href="#">6894</a>   | <a href="#">TARBP1</a>    | TAR (HIV-1) RNA binding protein 1...  |
| TARS2     | <a href="#">80222</a>  | <a href="#">TARS2</a>     | "threonyl-tRNA synthetase 2, mito...  |
| TBP       | <a href="#">6908</a>   | <a href="#">TBP</a>       | TATA-box binding protein [Source:...  |
| TBX6      | <a href="#">6911</a>   | <a href="#">TBX6</a>      | T-box transcription factor 6 [Sou...  |
| TBXAS1    | <a href="#">6916</a>   | <a href="#">TBXAS1</a>    | thromboxane A synthase 1 [Source:...  |
| TESC      | <a href="#">54997</a>  | <a href="#">TESC</a>      | tescalcin [Source:HGNC Symbol;Acc...  |
| TFDP1     | <a href="#">7027</a>   | <a href="#">TFDP1</a>     | transcription factor Dp-1 [Source...  |
| TIMP2     | <a href="#">7077</a>   | <a href="#">TIMP2</a>     | TIMP metalloproteinase inhibitor 2... |
| TK2       | <a href="#">7084</a>   | <a href="#">TK2</a>       | thymidine kinase 2 [Source:HGNC S...  |
| TM9SF4    | <a href="#">9777</a>   | <a href="#">TM9SF4</a>    | transmembrane 9 superfamily membe...  |
| TMC8      | <a href="#">147138</a> | <a href="#">TMC8</a>      | transmembrane channel like 8 [Sou...  |
| TMCC2     | <a href="#">9911</a>   | <a href="#">TMCC2</a>     | transmembrane and coiled-coil dom...  |
| TMEM104   | <a href="#">54868</a>  | <a href="#">TMEM104</a>   | transmembrane protein 104 [Source...  |
| TMEM115   | <a href="#">11070</a>  | <a href="#">TMEM115</a>   | transmembrane protein 115 [Source...  |
| TMEM143   | <a href="#">55260</a>  | <a href="#">TMEM143</a>   | transmembrane protein 143 [Source...  |
| TMEM148   | <a href="#">197196</a> | <a href="#">LINC00311</a> | long intergenic non-protein codin...  |
| TMEM173   | <a href="#">340061</a> | <a href="#">STING1</a>    | stimulator of interferon response...  |
| TMEM41B   | <a href="#">440026</a> | <a href="#">TMEM41B</a>   | transmembrane protein 41B [Source...  |
| TNFAIP2   | <a href="#">7127</a>   | <a href="#">TNFAIP2</a>   | TNF alpha induced protein 2 [Sour...  |
| TNFAIP3   | <a href="#">7128</a>   | <a href="#">TNFAIP3</a>   | TNF alpha induced protein 3 [Sour...  |
| TNFRSF10B | <a href="#">8795</a>   | <a href="#">TNFRSF10B</a> | TNF receptor superfamily member 1...  |
| TNFRSF4   | <a href="#">7293</a>   | <a href="#">TNFRSF4</a>   | TNF receptor superfamily member 4...  |
| TOMM20    | <a href="#">9804</a>   | <a href="#">TOMM20</a>    | translocase of outer mitochondria...  |
| TOMM40    | <a href="#">10452</a>  | <a href="#">TOMM40</a>    | translocase of outer mitochondria...  |
| TOX2      | <a href="#">84969</a>  | <a href="#">TOX2</a>      | TOX high mobility group box famil...  |
| TPD52L2   | <a href="#">7165</a>   | <a href="#">TPD52L2</a>   | TPD52 like 2 [Source:HGNC Symbol;...  |
| TPPP3     | <a href="#">51673</a>  | <a href="#">TPPP3</a>     | tubulin polymerization promoting ...  |
| TPR       | <a href="#">7175</a>   | <a href="#">TPR</a>       | "translocated promoter region, nu...  |
| TPRA1     | <a href="#">131601</a> | <a href="#">TPRA1</a>     | transmembrane protein adipocyte a...  |
| TRIM72    | <a href="#">493829</a> | <a href="#">TRIM72</a>    | tripartite motif containing 72 [S...  |
| TRIP4     | <a href="#">9325</a>   | <a href="#">TRIP4</a>     | thyroid hormone receptor interact...  |
| TRNP1     | <a href="#">388610</a> | <a href="#">TRNP1</a>     | TMF1 regulated nuclear protein 1 ...  |
| TSSK3     | <a href="#">81629</a>  | <a href="#">TSSK3</a>     | testis specific serine kinase 3 [...  |
| TUBA1C    | <a href="#">84790</a>  | <a href="#">TUBA1C</a>    | tubulin alpha 1c [Source:HGNC Sym...  |
| TUBGCP2   | <a href="#">10844</a>  | <a href="#">TUBGCP2</a>   | tubulin gamma complex associated ...  |
| TYK2      | <a href="#">7297</a>   | <a href="#">TYK2</a>      | tyrosine kinase 2 [Source:HGNC Sy...  |
| TYROBP    | <a href="#">7305</a>   | <a href="#">TYROBP</a>    | TYRO protein tyrosine kinase bind...  |
| UACA      | <a href="#">55075</a>  | <a href="#">UACA</a>      | uveal autoantigen with coiled-coi...  |
| UBASH3B   | <a href="#">84959</a>  | <a href="#">UBASH3B</a>   | ubiquitin associated and SH3 doma...  |

|         |                        |                         |                                       |
|---------|------------------------|-------------------------|---------------------------------------|
| UBE2O   | <a href="#">63893</a>  | <a href="#">UBE2O</a>   | ubiquitin conjugating enzyme E2 O...  |
| UBE2R2  | <a href="#">54926</a>  | <a href="#">UBE2R2</a>  | ubiquitin conjugating enzyme E2 R...  |
| UBL3    | <a href="#">5412</a>   | <a href="#">UBL3</a>    | ubiquitin like 3 [Source:HGNC Sym...  |
| UBN2    | <a href="#">254048</a> | <a href="#">UBN2</a>    | ubinnuclein 2 [Source:HGNC Symbol;... |
| UCK2    | <a href="#">7371</a>   | <a href="#">UCK2</a>    | uridine-cytidine kinase 2 [Source...  |
| UPB1    | <a href="#">51733</a>  | <a href="#">UPB1</a>    | beta-ureidopropionase 1 [Source:H...  |
| UPP1    | <a href="#">7378</a>   | <a href="#">UPP1</a>    | uridine phosphorylase 1 [Source:H...  |
| VASP    | <a href="#">7408</a>   | <a href="#">VASP</a>    | vasodilator stimulated phosphopro...  |
| WDR26   | <a href="#">80232</a>  | <a href="#">WDR26</a>   | WD repeat domain 26 [Source:HGNC ...  |
| WDR51A  | <a href="#">25886</a>  | <a href="#">POC1A</a>   | POC1 centriolar protein A [Source...  |
| WDR81   | <a href="#">124997</a> | <a href="#">WDR81</a>   | WD repeat domain 81 [Source:HGNC ...  |
| WNT5B   | <a href="#">81029</a>  | <a href="#">WNT5B</a>   | Wnt family member 5B [Source:HGNC...  |
| WNT9A   | <a href="#">7483</a>   | <a href="#">WNT9A</a>   | Wnt family member 9A [Source:HGNC...  |
| YTHDF2  | <a href="#">51441</a>  | <a href="#">YTHDF2</a>  | YTH N6-methyladenosine RNA bindin...  |
| ZBTB16  | <a href="#">7704</a>   | <a href="#">ZBTB16</a>  | zinc finger and BTB domain contai...  |
| ZBTB3   | <a href="#">79842</a>  | <a href="#">ZBTB3</a>   | zinc finger and BTB domain contai...  |
| ZC3H12A | <a href="#">80149</a>  | <a href="#">ZC3H12A</a> | zinc finger CCCH-type containing ...  |
| ZC3H4   | <a href="#">23211</a>  | <a href="#">ZC3H4</a>   | zinc finger CCCH-type containing ...  |
| ZDHHC19 | <a href="#">131540</a> | <a href="#">ZDHHC19</a> | zinc finger DHHC-type containing ...  |
| ZFYVE28 | <a href="#">57732</a>  | <a href="#">ZFYVE28</a> | zinc finger FYVE-type containing ...  |
| ZMIZ1   | <a href="#">57178</a>  | <a href="#">ZMIZ1</a>   | zinc finger MIZ-type containing 1...  |
| ZNF595  | <a href="#">152687</a> | <a href="#">ZNF595</a>  | zinc finger protein 595 [Source:H...  |
| ZNF683  | <a href="#">257101</a> | <a href="#">ZNF683</a>  | zinc finger protein 683 [Source:H...  |
| ZNF710  | <a href="#">374655</a> | <a href="#">ZNF710</a>  | zinc finger protein 710 [Source:H...  |
| ZZEF1   | <a href="#">23140</a>  | <a href="#">ZZEF1</a>   | zinc finger ZZ-type and EF-hand d...  |

### Supplementary Fig. 1 Related to Figure 2 and 3

- (A) Western blot analysis of the levels of indicated proteins and histone marks in two control (Ctrl) and two KDM5A-KO NB4 cells.
- (B) ChIP-seq snapshots of *FBRSL1* for KDM5A, H3K4me1 and input in NB4; H3K4me2, H3K4me3 and RNA-seq in the control and KDM5A-KO NB4 cells.
- (C) Heatmap analysis of the ChIP-seq profiles of KDM5A in NB4 and H3K4me2 in the control and KDM5A-KO NB4 cells. The genebodies with up-regulated H3K4me2 but not able to call KDM5A peaks were shown ( $\pm 3$  kb), sorted by KDM5A binding intensity.
- (D) Proliferation assay of control cells, KDM5A-KO cells, or KDM5B-KO cells for the indicated days. Viable cells were detected by trypan blue exclusion assay. Statistical significance was determined by 2way ANOVA between Ctrl1 and KDM5B-KO, n.s.,  $p > 0.05$ .
- (E) Western blot analysis of the levels of indicated proteins in two control (Ctrl), two KDM5A-KO and KDM5B-KO NB4 cells. The specific band for KDM5B is marked by red arrow.

### Supplementary Fig. 2 Related to Figure 4

- (A) GSEA plots showing the differential expressed genes enriched for (a) Acute myeloid leukemia signature (NES=-2.0, FDR=0.0056), (b) MYC Target (NES=-2.0, FDR=0.0000), (c) B cell receptor signaling pathway (NES=-2.0, FDR=0.0015) and (d) PI3K-AKT-mTOR pathway (NES=-2.0, FDR=0.005) in KDM5A KO compared to control NB4 cells.

# Supplementary Figure 1

**A**

## Western blot

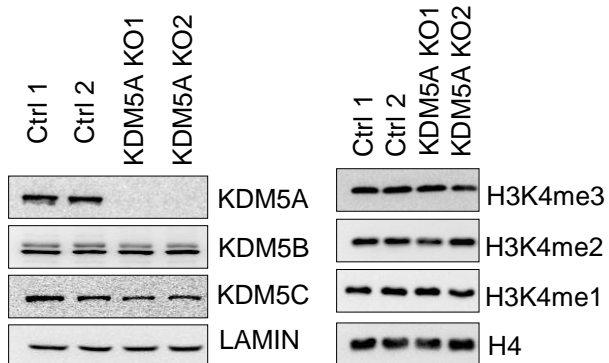

**B**

## ChIP-seq

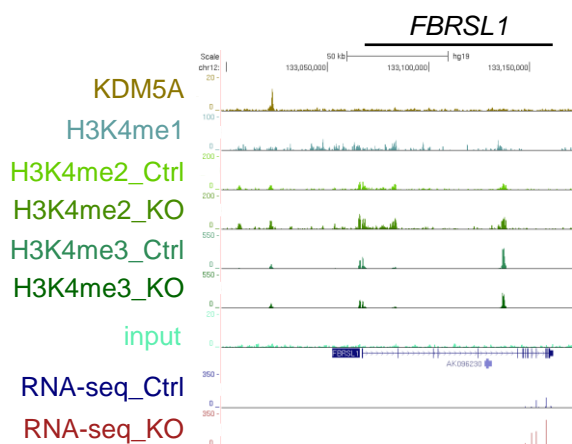

**C**

## ChIP-seq heatmap

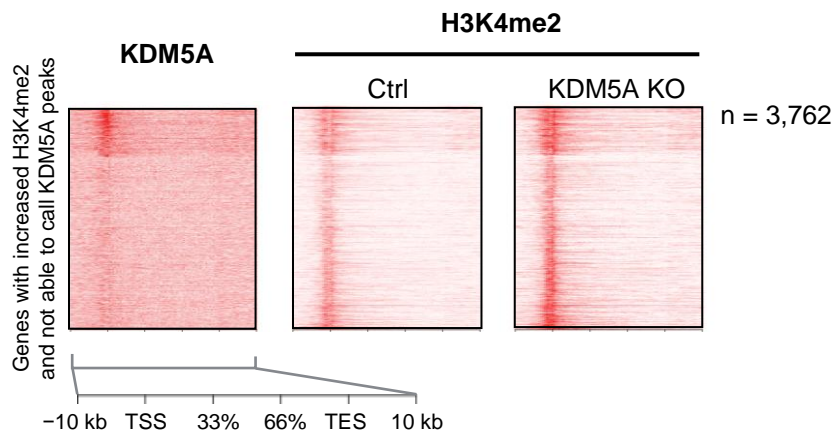

**D**

## Proliferation Assay

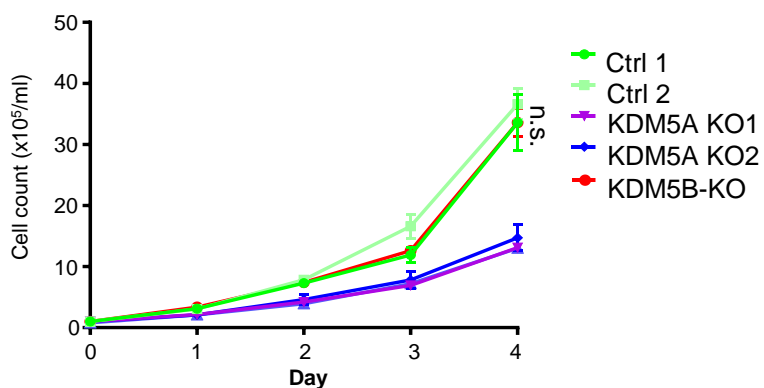

**E**

## Western blot

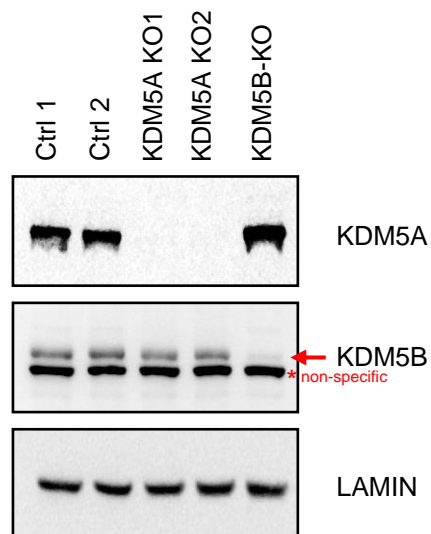



# Supplementary Figure 2

A

## RNA-seq GSEA plots

a) FDR=0.0056

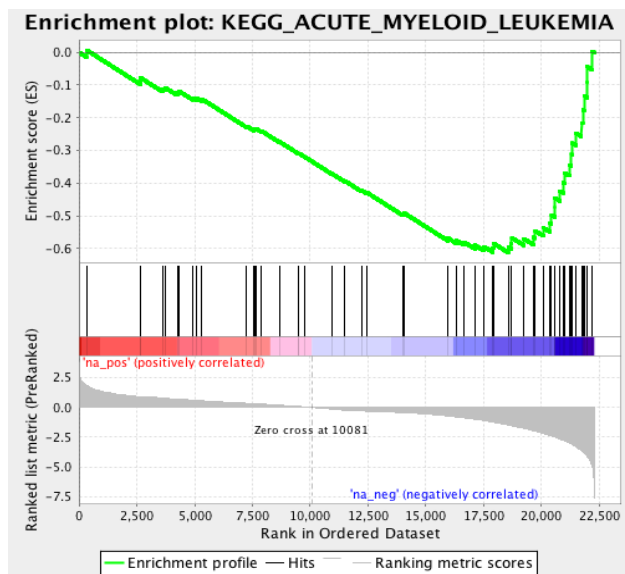

b) FDR=0.0000

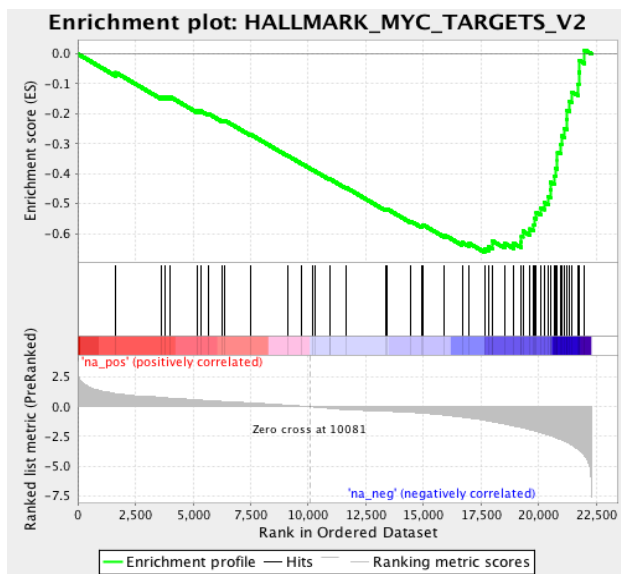

c) FDR=0.015

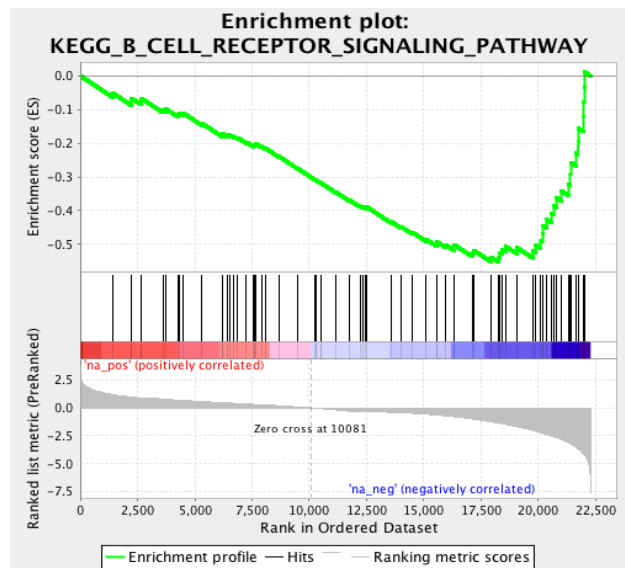

d) FDR=0.005

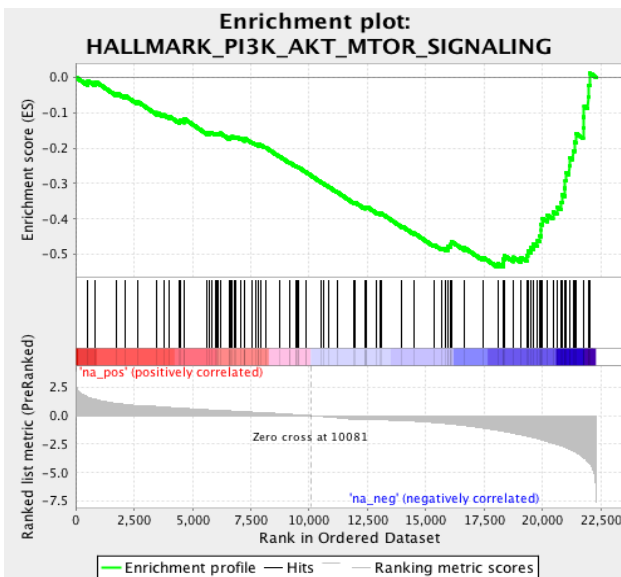

Supplement: advancesADV2020002819-suppl1.pdf [file advancesADV2020002819-suppl1.pdf]
